# Supplementary material for: Machine Learning Models for Prediction of Severe Pneumocystis carinii Pneumonia after Kidney Transplantation: A Single-Center Retrospective Study
Source: MDPI journal article supplement (doi:10.3390/diagnostics13172735), 2023-08-23
Supplement: s1 [file s1]

Table S1. Multicollinearity analysis of model variables

| Variable            | VIF   |
|---------------------|-------|
| PCT                 | 1.502 |
| Hb                  | 1.374 |
| ALB                 | 1.318 |
| Progressive dyspnea | 1.313 |
| CRP                 | 1.106 |

VIF: Variance Inflation Factor; CRP: C-reactive protein; PCT: procalcitonin; Hb: Hemoglobin; ALB: albumin.

Table S2. Tuning parameters of the predictive models

| Classification model | Hyperparameter        | Define Hyperparameter Ranges                            | Optimum value   |
|----------------------|-----------------------|---------------------------------------------------------|-----------------|
| LR                   | C                     | 0.01~10                                                 | 10              |
|                      | max_iter              | 10~500                                                  | 100             |
|                      | penalty               | l2/none                                                 | l2              |
|                      | tol                   | 1.00E-09~0.1                                            | 1.00E-06        |
| XGB                  | objective             | binary:logistic/binary:logitraw/reg:linear/reg:logistic | binary:logistic |
|                      | learning_rate         | 0.001~2                                                 | 0.1             |
|                      | max_depth             | 1~20                                                    | 8               |
|                      | min_child_weight      | 1~20                                                    | 2               |
| RF                   | reg_lambda            | 0.001~5                                                 | 1               |
|                      | criterion             | gini/entropy                                            | gini            |
|                      | max_depth             | 1~20                                                    | None            |
|                      | min_impurity_decrease | 0~20                                                    | 0               |
| SVM                  | n_estimators          | 1~200                                                   | 100             |
|                      | C                     | 0.01~10                                                 | 1               |
|                      | kernel                | rbf/linear/poly/sigmoid                                 | rbf             |
|                      | tol                   | 1.00E-09~0.1                                            | 0.1             |
| LGBM                 | boosting_type         | gbdt/dart/goss                                          | gbdt            |
|                      | learning_rate         | 0.001~2                                                 | 0.001           |
|                      | max_depth             | -1~20                                                   | 1               |
|                      | n_estimators          | 1~200                                                   | 50              |
| KNN                  | num_leaves            | 1~200                                                   | 5               |
|                      | n_neighbors           | 1~20                                                    | 5               |
|                      | weights               | uniform/distance                                        | uniform         |

Using five-fold cross-validation in the training set, the AUC in the internal validation set is maximised by grid-tuning parameters to determine the optimal hyperparameters.

Table S3. Summary of the specific performance of the six machine algorithm models in the internal validation set.

|    | AUC(95%CI)     | Accuracy(95%CI)    | Sensitivity(95%CI) | Specificity(95%CI) | PPV(95%CI)         | NPV(95%CI)         | F1_Score(95%CI)    |
|----|----------------|--------------------|--------------------|--------------------|--------------------|--------------------|--------------------|
| RF | 0.951(NaN-NaN) | 0.896(0.839-0.952) | 0.920(0.847-0.993) | 0.933(0.846-1.020) | 0.920(0.847-0.993) | 0.882(0.809-0.955) | 0.917(0.865-0.968) |
| LR | 0.948(NaN-NaN) | 0.917(0.865-0.969) | 0.920(0.847-0.993) | 0.933(0.846-1.020) | 0.944(0.871-1.016) | 0.901(0.847-0.955) | 0.929(0.871-0.988) |

|      |                    |                    |                    |                    |                    |                    |                    |
|------|--------------------|--------------------|--------------------|--------------------|--------------------|--------------------|--------------------|
| XGB  | 0.906(0.780-1.000) | 0.814(0.741-0.886) | 0.940(0.862-1.018) | 0.831(0.775-0.887) | 0.818(0.774-0.862) | 0.836(0.718-0.953) | 0.874(0.817-0.932) |
| SVM  | 0.960(NaN-NaN)     | 0.886(0.827-0.945) | 0.920(0.806-1.034) | 0.958(0.907-1.009) | 0.905(0.825-0.985) | 0.884(0.812-0.956) | 0.911(0.818-1.003) |
| KNN  | 0.967(0.905-1.000) | 0.834(0.731-0.937) | 0.936(0.884-0.987) | 0.936(0.849-1.022) | 0.978(0.934-1.021) | 0.777(0.654-0.900) | 0.954(0.932-0.977) |
| LGBM | 0.814(0.634-0.976) | 0.563(0.451-0.676) | 0.836(0.720-0.951) | 0.809(0.724-0.894) | NaN(NaN-NaN)       | 0.577(0.438-0.715) | NaN(NaN-NaN)       |

RF: Random Forest; LR: Logistic Regression; XGB: eXtreme Gradient Boosting; SVM: Support Vector Machine; KNN: K-Nearest Neighbor; LGBM: light gradient boosting machine; AUC: area under the curve; PPV: PositivePredictive Value; NPV: Negative predictive value
